# Supplementary material for: Glycal approach to the synthesis of macrolide (−)-A26771B
Source: Royal Society of Chemistry journal article supplement (doi:10.1039/c4ra17084a), 2015-01-01
Supplement: c4ra17084a1.pdf [file c4ra17084a1.pdf]

## Supplementary Data

### **‘Glycal Approach to the Synthesis of Macrolide (-)-A26771B’**

Puli Saidhareddy and Arun K. Shaw\*

*Division of Medicinal and Process Chemistry, CSIR-Central Drug Research Institute, Lucknow 226 031, India.*

#### **Contents:**

|                                                                        |                 |
|------------------------------------------------------------------------|-----------------|
| 1. <sup>1</sup> H and <sup>13</sup> C data of Compound <b>11</b>       | Page No – 2     |
| 2. <sup>1</sup> H and <sup>13</sup> C data of Compound <b>6</b>        | Page No – 3     |
| 3. <sup>1</sup> H and <sup>13</sup> C data of Compound <b>12</b>       | Page No – 4     |
| 4. <sup>1</sup> H and <sup>13</sup> C data of Compound <b>13</b>       | Page No – 5     |
| 5. <sup>1</sup> H and <sup>13</sup> C data of Compound <b>14</b>       | Page No – 6     |
| 6. <sup>1</sup> H and <sup>13</sup> C data of Compound <b>3</b>        | Page No – 7     |
| 7. <sup>1</sup> H and <sup>13</sup> C data of Compound <b>16</b>       | Page No – 8     |
| 8. <sup>1</sup> H and <sup>13</sup> C data of Compound <b>8</b>        | Page No – 9     |
| 9. <sup>1</sup> H and <sup>13</sup> C data of Compound <b>4</b>        | Page No – 10    |
| 10. <sup>1</sup> H and <sup>13</sup> C data of Compound <b>17</b>      | Page No – 11    |
| 11. <sup>1</sup> H and <sup>13</sup> C data of Compound <b>18</b>      | Page No – 12    |
| 12. <sup>1</sup> H and <sup>13</sup> C data of Compound <b>20</b>      | Page No – 13    |
| 13. <sup>1</sup> H and <sup>13</sup> C data of compound <b>21</b>      | Page No – 14    |
| 14. <sup>1</sup> H and <sup>13</sup> C data of compound <b>2</b>       | Page No – 15    |
| 15. <sup>1</sup> H and <sup>13</sup> C data of (-)- <b>A26771B (1)</b> | Page No – 16    |
| 16. <sup>1</sup> H and HPLC data of compound <b>19</b>                 | Page No – 17-18 |

---

\*Corresponding author. Tel.: +919415403775; fax: +91(522)2623405; e-mail: [akshaw55@yahoo.com](mailto:akshaw55@yahoo.com)

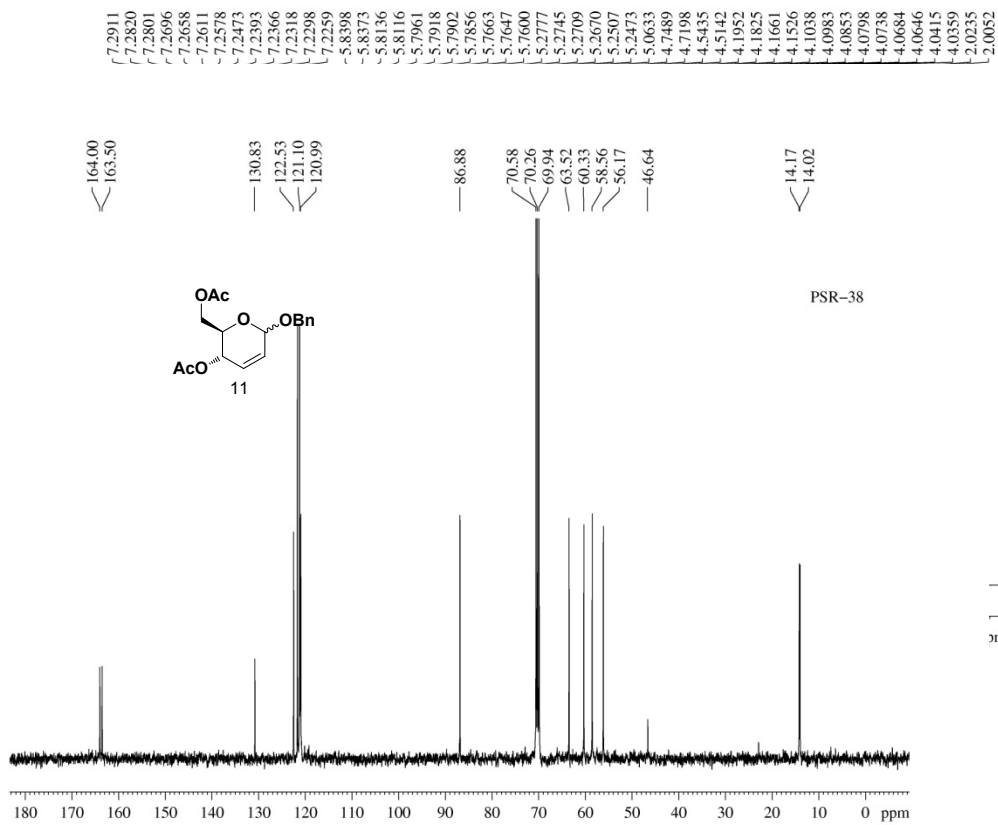

**<sup>1</sup>H and <sup>13</sup>C spectra of compound 11**

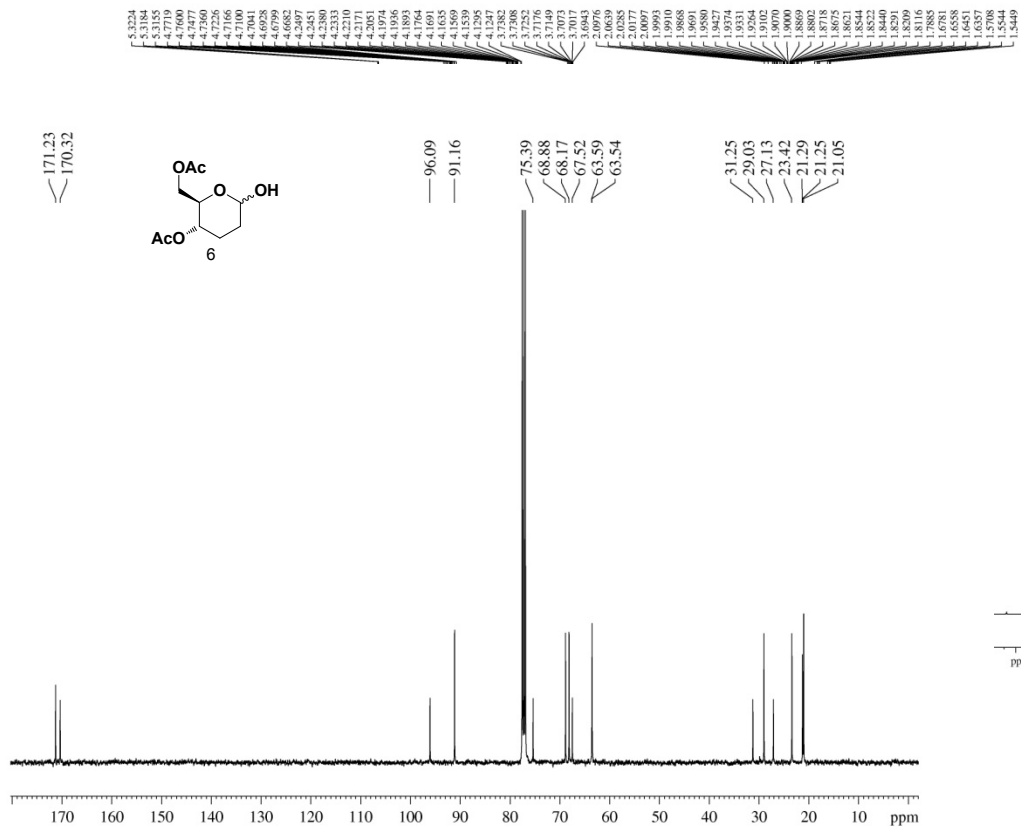

**<sup>1</sup>H and <sup>13</sup>C spectra of compound 6**

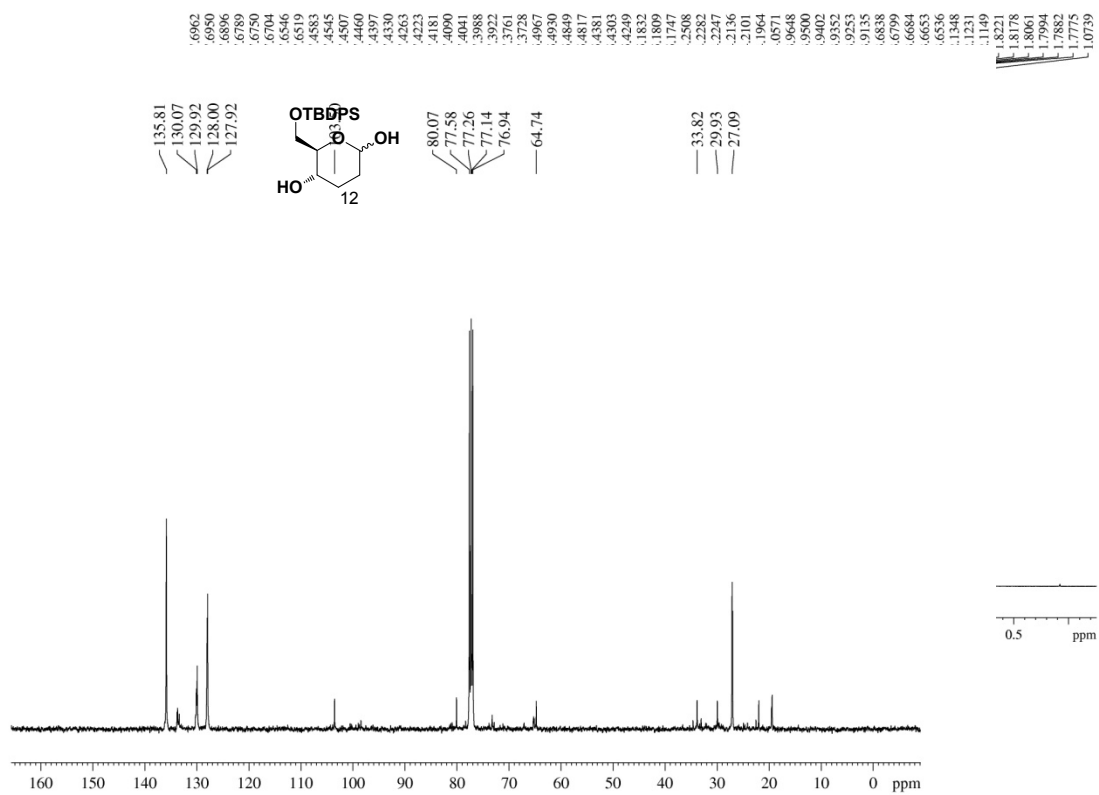

**$^1\text{H}$  and  $^{13}\text{C}$  spectra of compound 12**

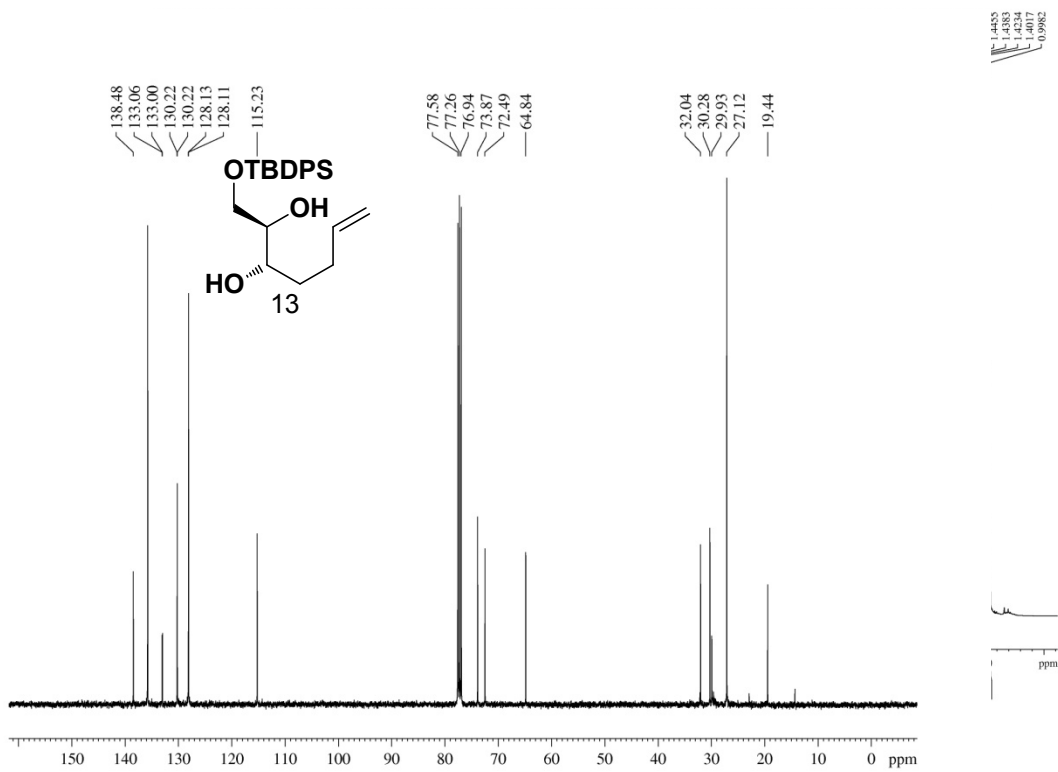

**$^1\text{H}$  and  $^{13}\text{C}$  spectra of compound 13**

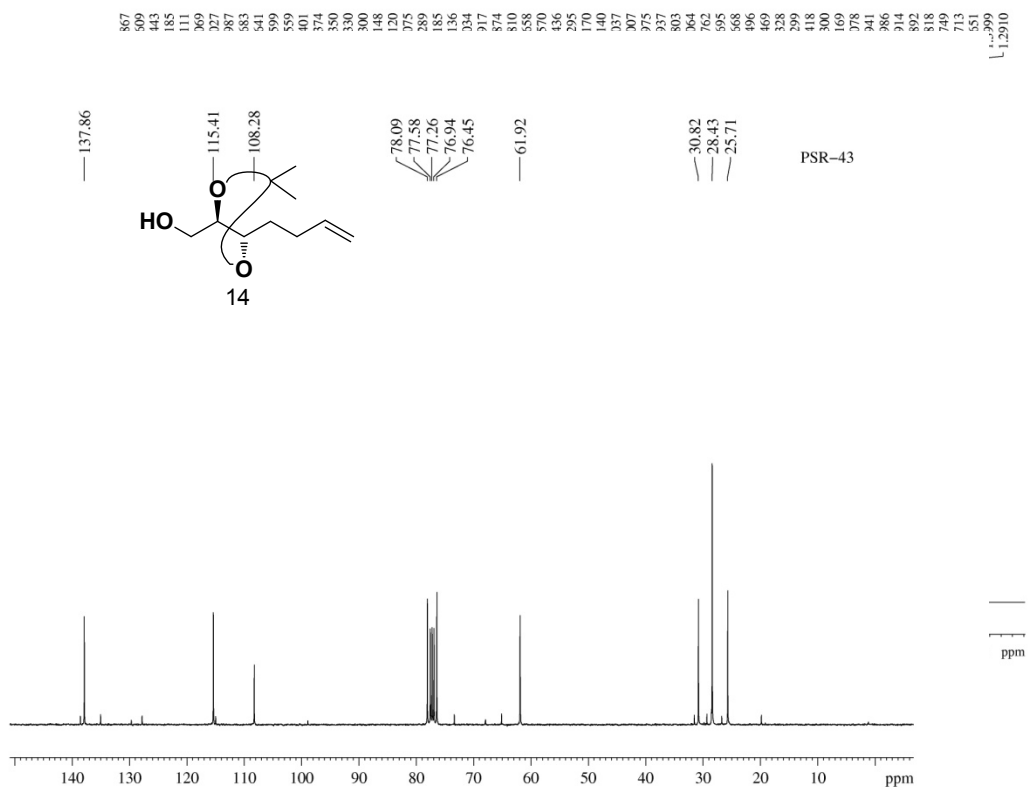

**$^1\text{H}$  and  $^{13}\text{C}$  spectra of compound 14**

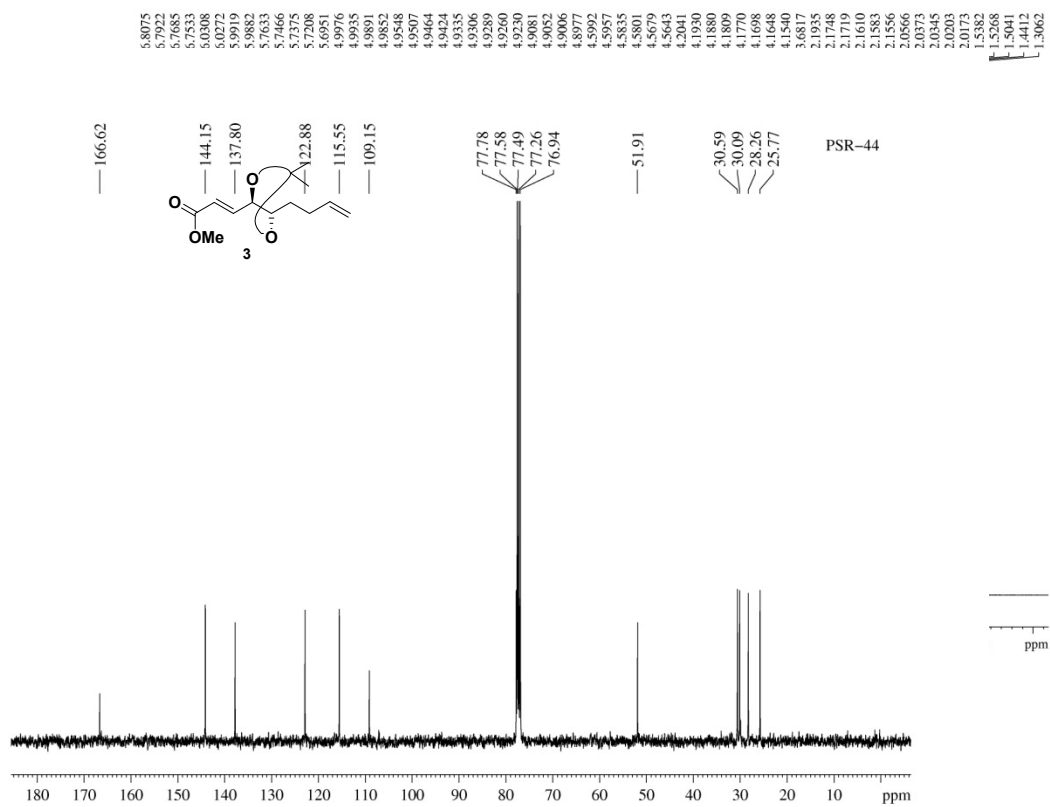

**<sup>1</sup>H and <sup>13</sup>C spectra of compound 3**

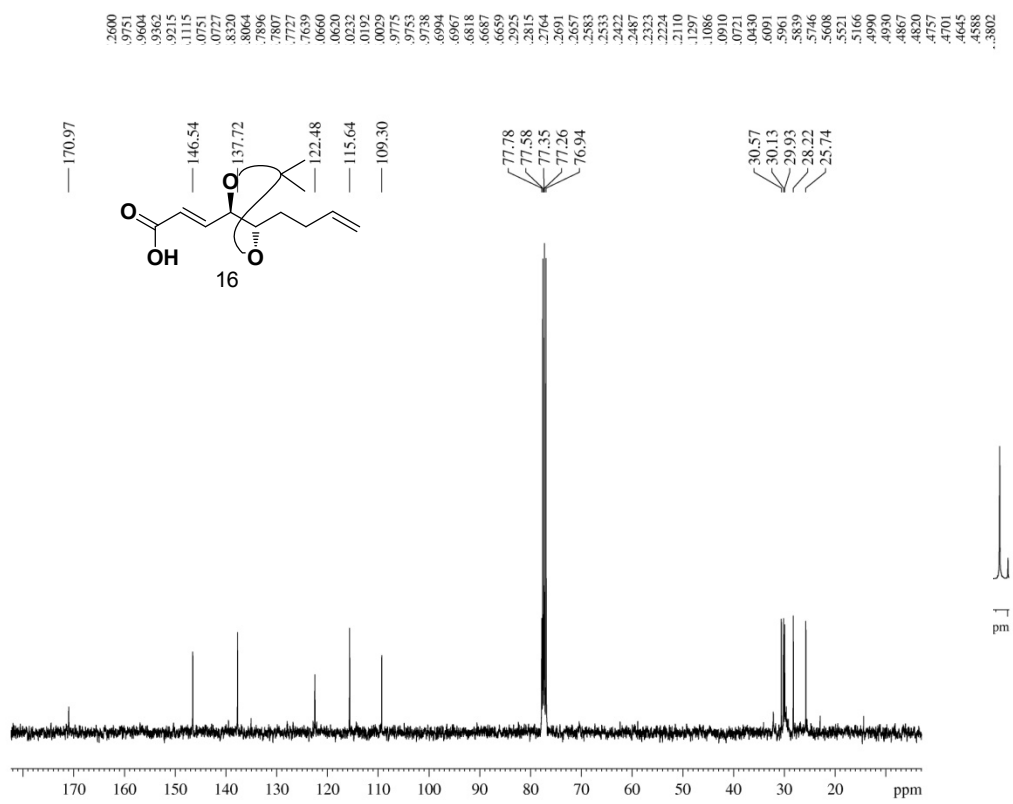

**<sup>1</sup>H and <sup>13</sup>C spectra of compound 16**



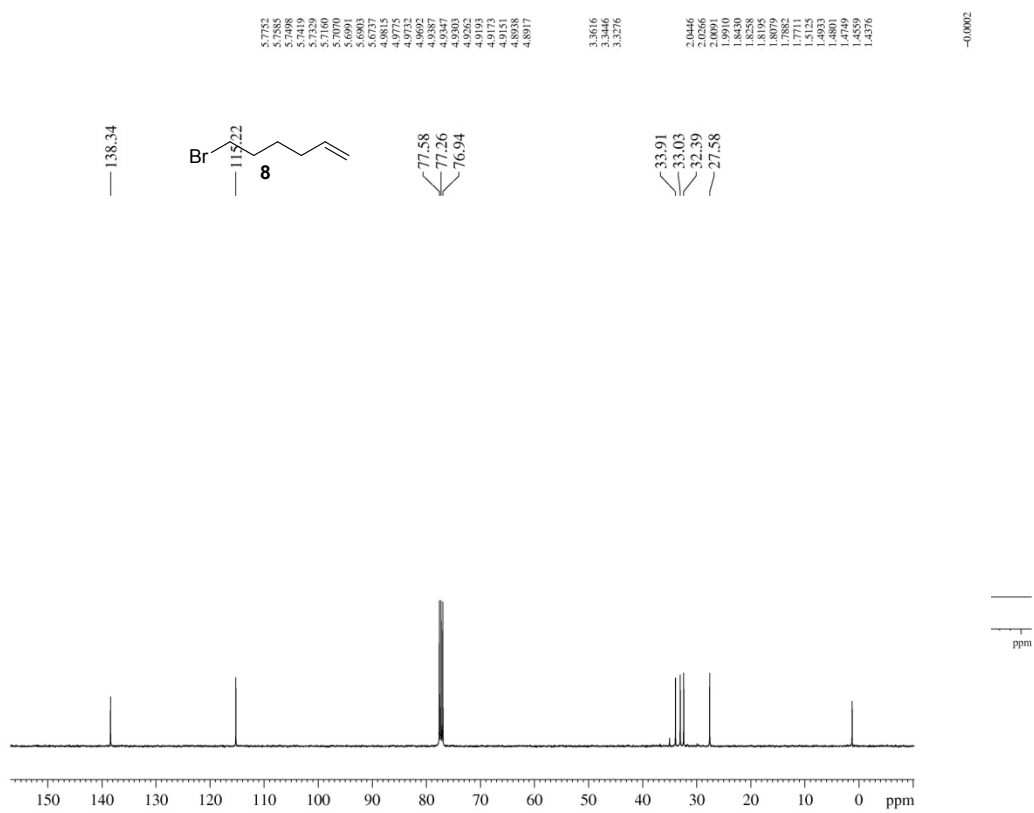

**$^1\text{H}$  and  $^{13}\text{C}$  spectra of compound 8**

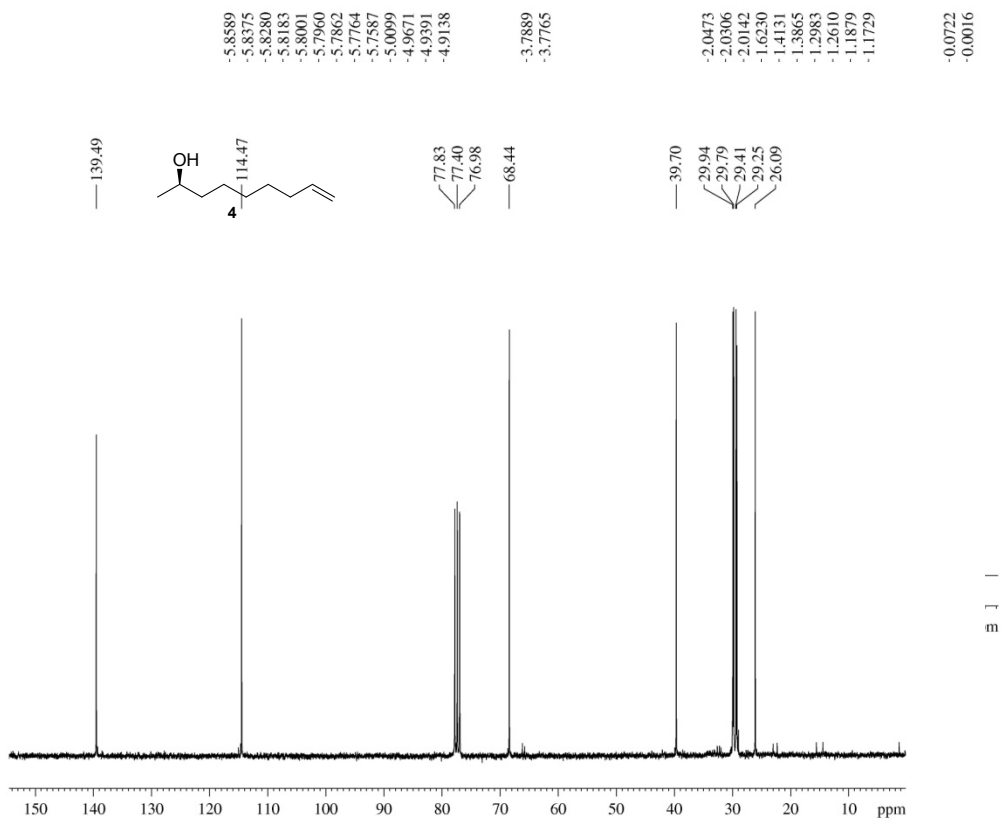

### <sup>1</sup>H and <sup>13</sup>C spectra of compound 4

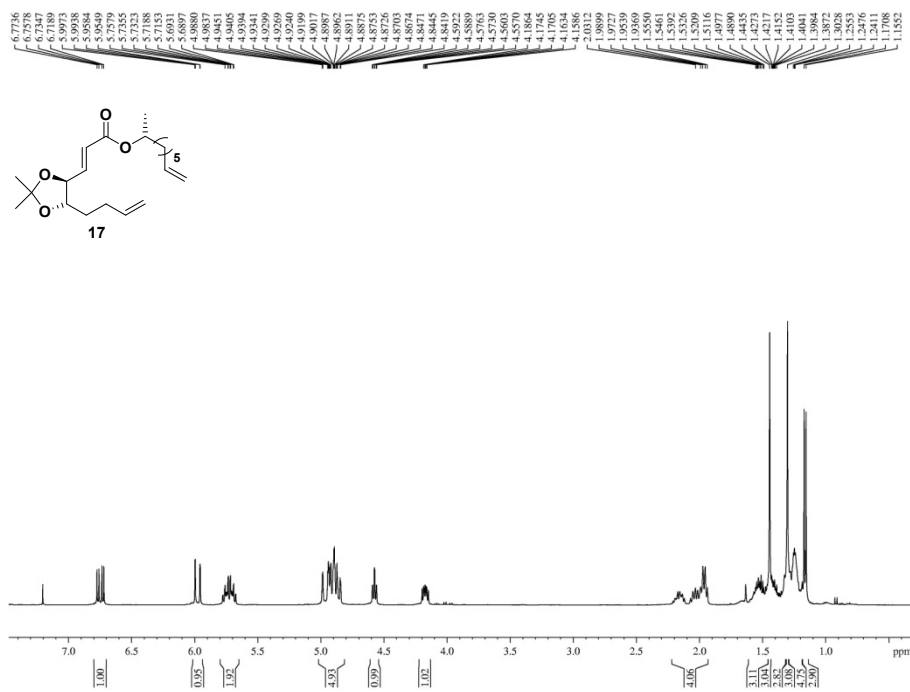

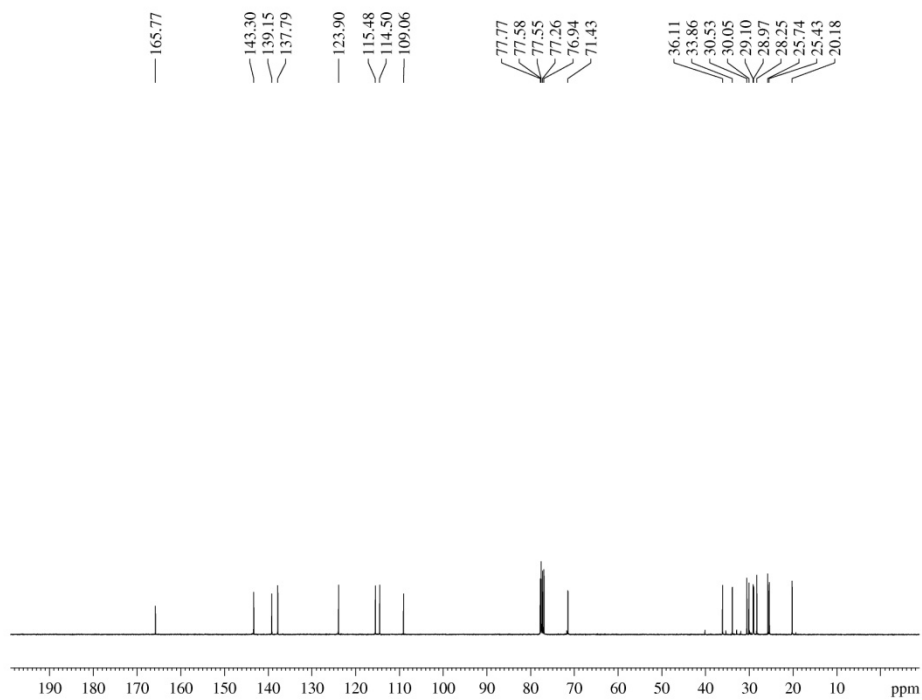

**$^1\text{H}$  and  $^{13}\text{C}$  spectra of compound 17**

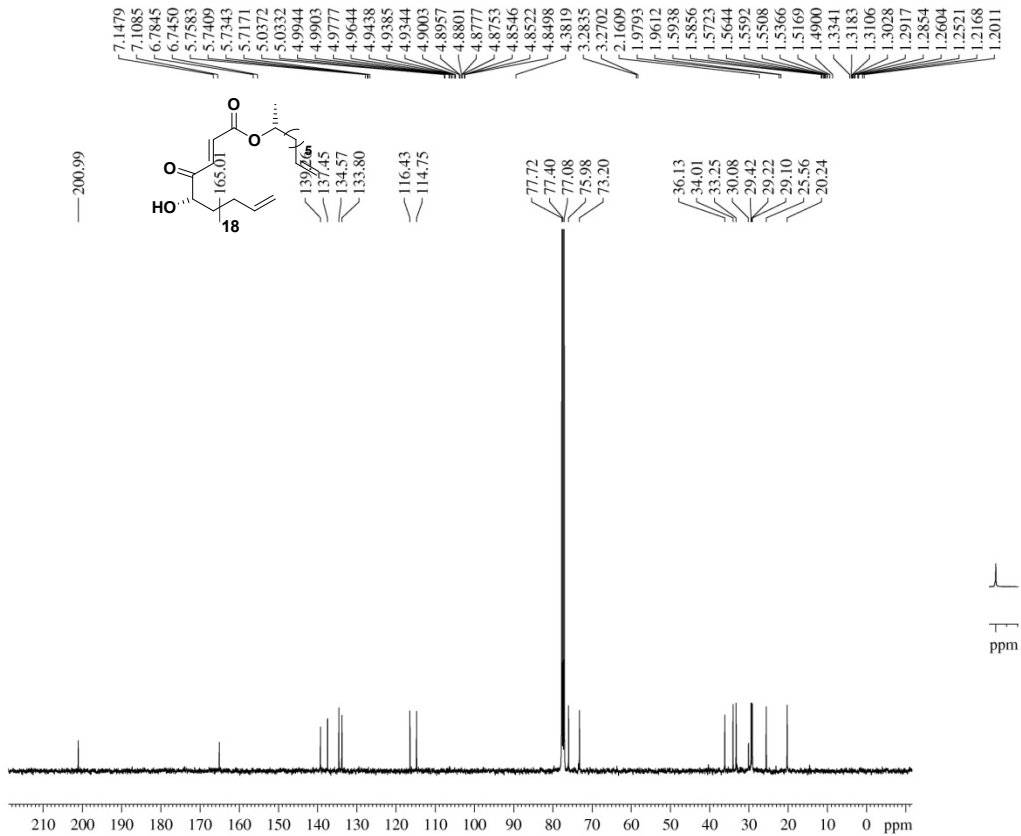

**$^1\text{H}$  and  $^{13}\text{C}$  spectra of compound 18**

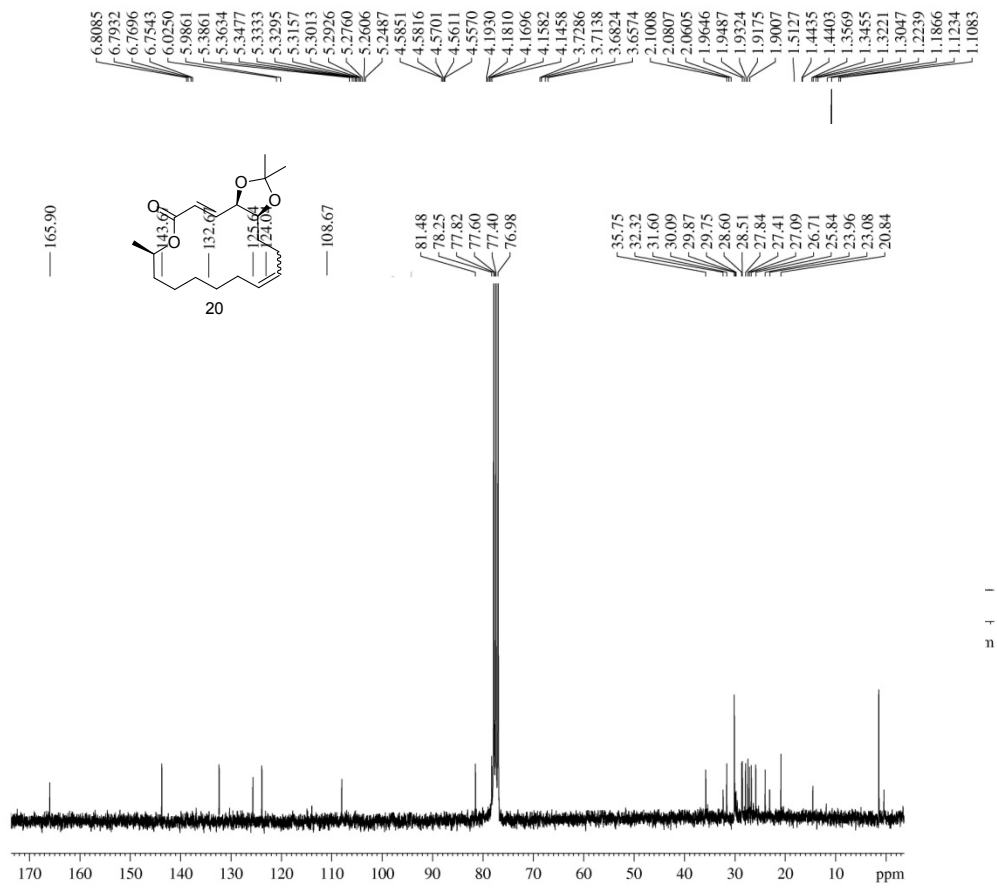

$^1\text{H}$  and  $^{13}\text{C}$  spectra of compound 20

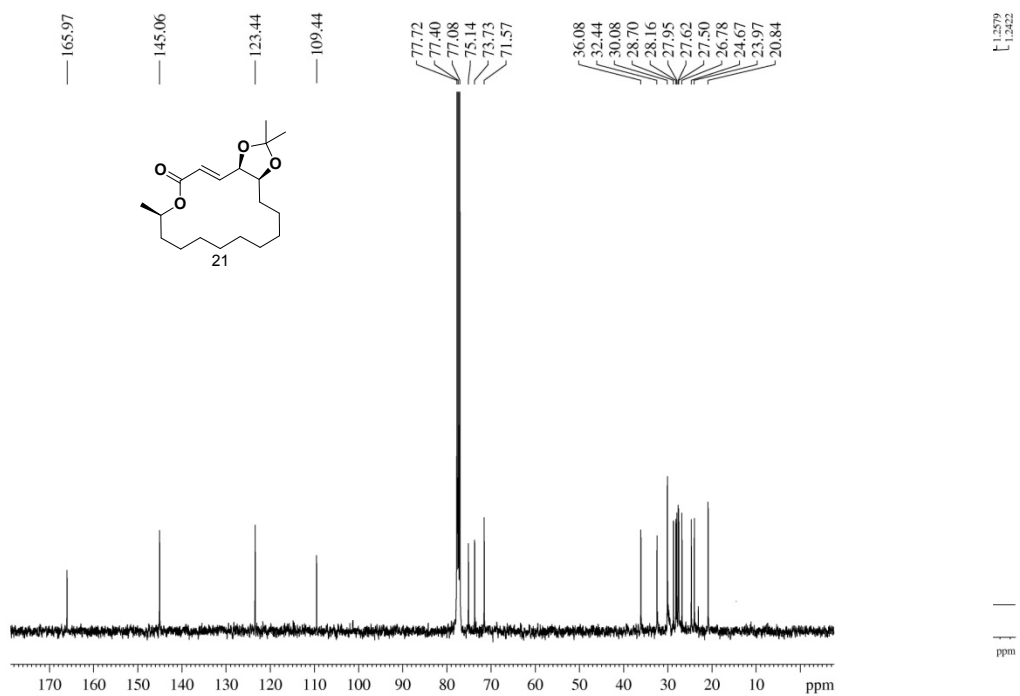

$^1\text{H}$  and  $^{13}\text{C}$  spectra of compound 21

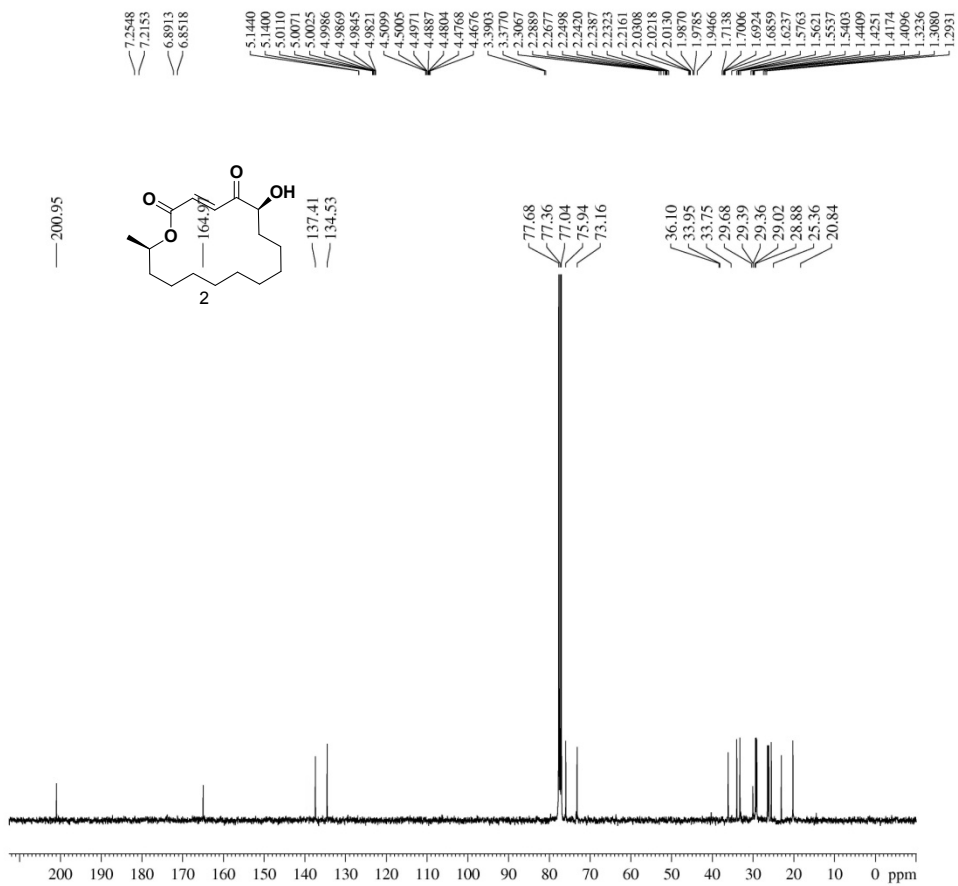

## <sup>1</sup>H and <sup>13</sup>C spectra of compound 2

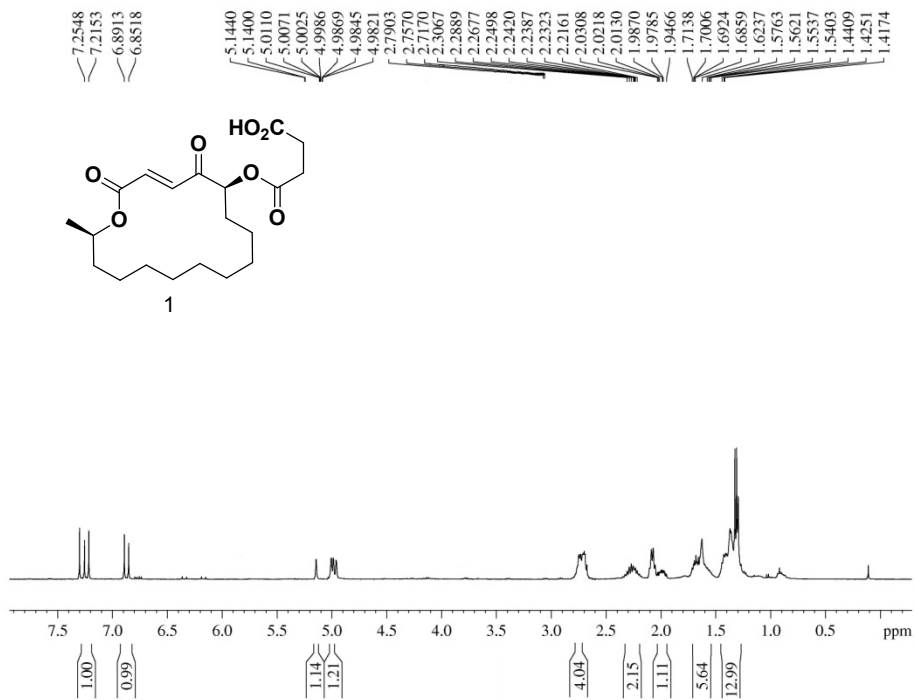

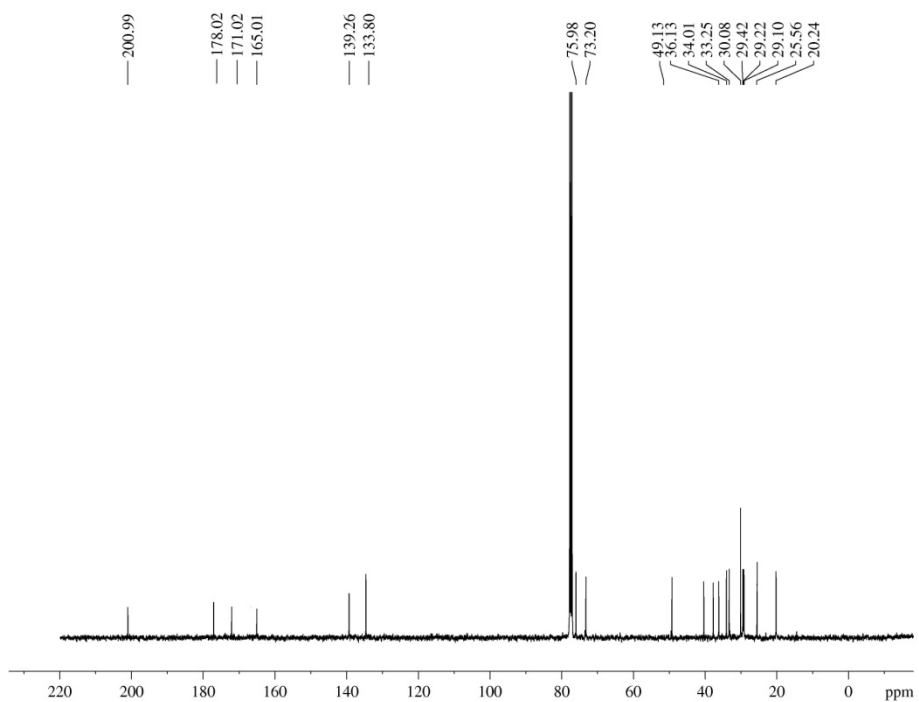

## $^1\text{H}$ and $^{13}\text{C}$ spectra of compound (-)-A26771B

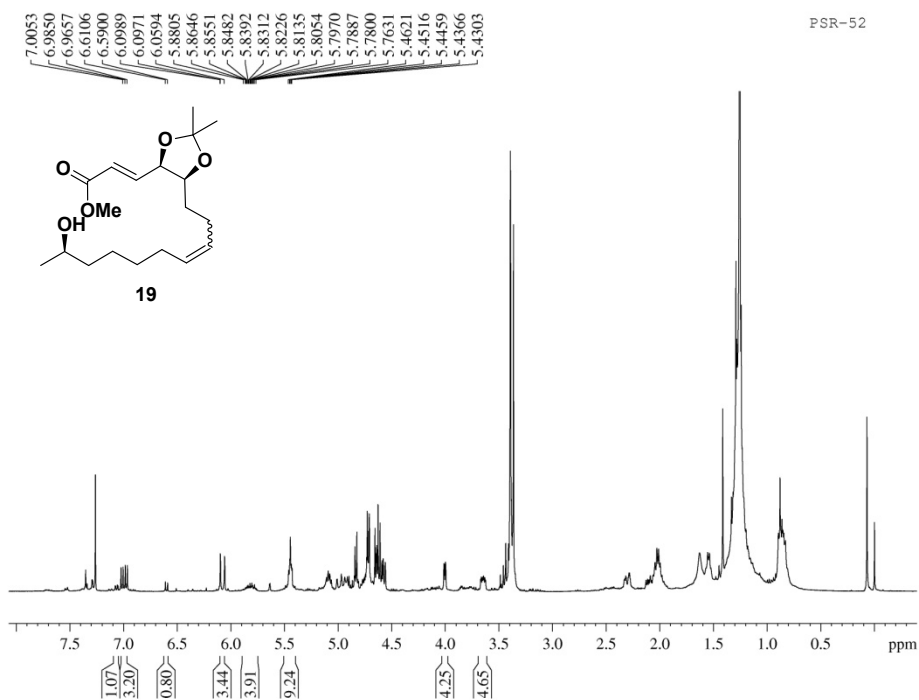



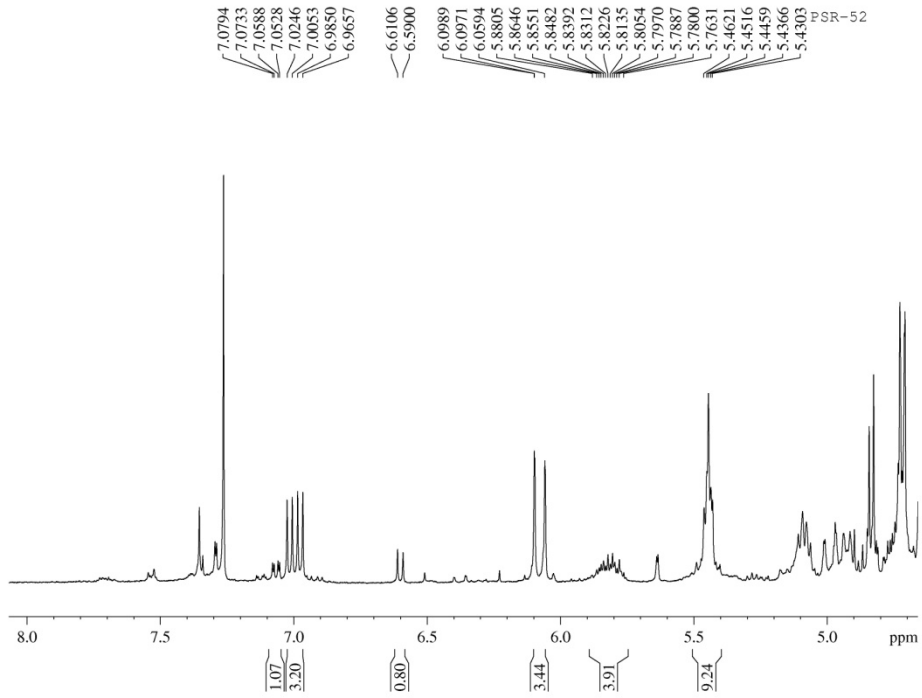

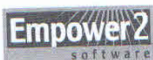

CDRI SAIF GLC & HPLC LAB  
Lucknow

### SAMPLE INFORMATION

|                   |                          |                    |               |
|-------------------|--------------------------|--------------------|---------------|
| Sample Name:      | PSR-52-3%ETOH            | Acquired By:       | System        |
| Sample Type:      | Unknown                  | SampleName:        | PSR-52-3%ETOH |
| Vial:             | 1                        | Acq. Method Set:   | GENERAL_HPLC  |
| Injection #:      | 3                        | Processing Method: | PSR 52 A      |
| Injection Volume: | 5.00 ul                  | Channel Name:      | 226.1nm       |
| Run Time:         | 20.0 Minutes             |                    |               |
| Date Acquired:    | 2/19/2015 3:44:11 PM IST |                    |               |
| Date Processed:   | 2/19/2015 4:09:01 PM IST |                    |               |

Auto-Scaled Chromatogram

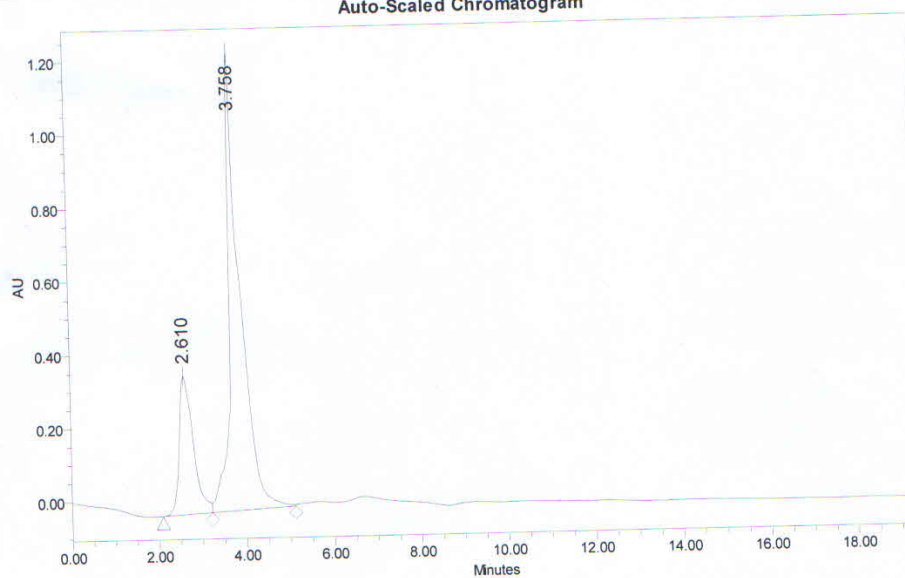

Peak Results

| Name | RT    | Area     | Height  | % Area |
|------|-------|----------|---------|--------|
| 1    | 2.610 | 8446087  | 377065  | 25.67  |
| 2    | 3.758 | 24459573 | 1251253 | 74.33  |

Reported by User: System  
Report Method: CDRI\_Report  
Report Method ID 23285  
Page: 1 of 1

Project Name: RKP  
Date Printed:  
2/19/2015  
4:09:32 PM Asia/Calcutta

**<sup>1</sup>H spectra and HPLC chromatogram of crude compound 19**
